# Supplementary material for: Dynamically downscaled seasonal ocean forecasts for North American east coast ecosystems
Source: Copernicus journal article supplement (doi:10.5194/os-20-1631-2024), 2024-12-10
Supplement: Supplementary file 1 [file os-20-1631-2024-supplement.pdf]

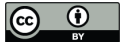

*Supplement of*

## **Dynamically downscaled seasonal ocean forecasts for North American east coast ecosystems**

**Andrew C. Ross et al.**

*Correspondence to:* Andrew C. Ross ([andrew.c.ross@noaa.gov](mailto:andrew.c.ross@noaa.gov))

The copyright of individual parts of the supplement might differ from the article licence.

### Sea surface temperature correlation

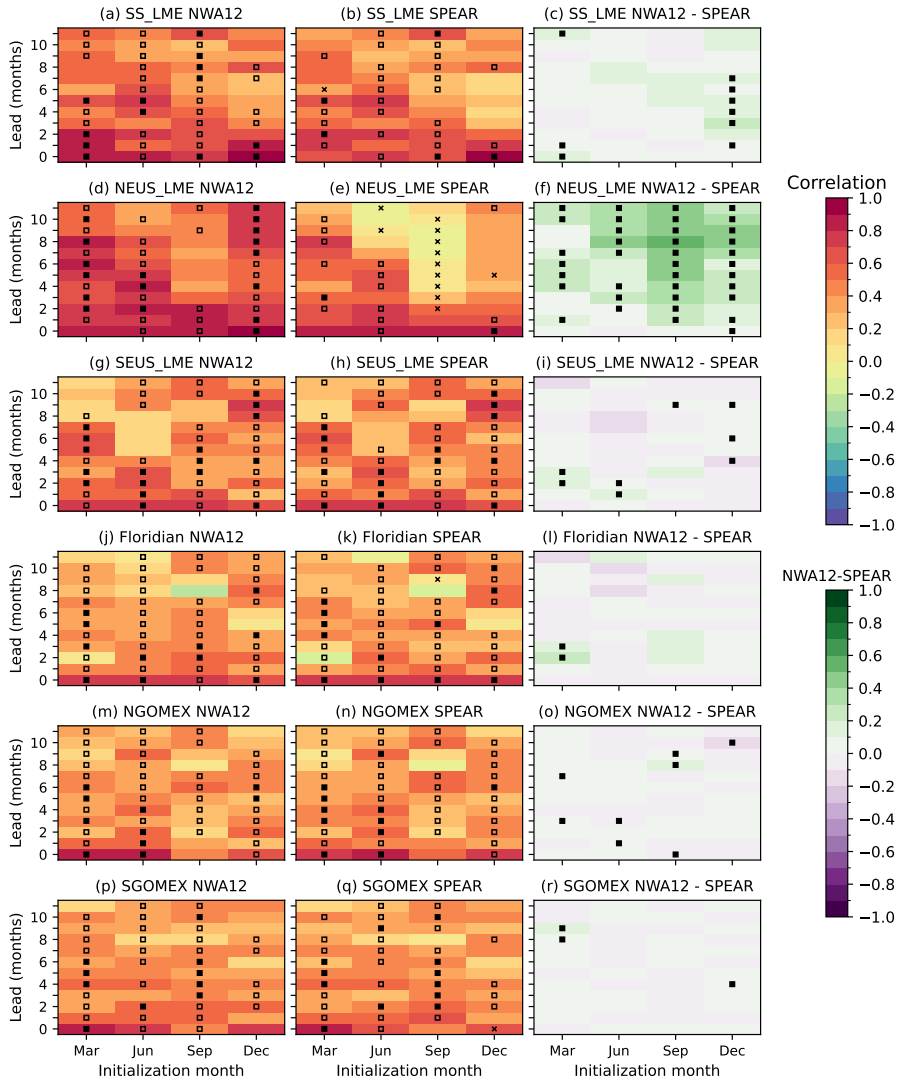

**Figure S1.** Comparison of sea surface temperature forecast–observation correlation coefficients for NWA12 (left column) and SPEAR (middle column) and the difference between the two (right column), using OISST as the observed dataset. In the left two columns, an open black square indicates a correlation that is greater than the persistence–observation correlation, a filled black square indicates that this difference is statistically significant, and a black x indicates a correlation that is significantly less than the persistence–observation correlation. In the right column, a filled black square indicates that the anomaly correlation of NWA12 is significantly different than the anomaly correlation of SPEAR.
